# Supplementary material for: Genome-wide identification and analysis of terpene synthase (TPS) genes in celery reveals their regulatory roles in terpenoid biosynthesis
Source: Frontiers journal article supplement (doi:10.3389/fpls.2022.1010780), 2022-09-29
Supplement: Data_Sheet_1.zip [file Data_Sheet_1.zip]

## Sheet: go enrichment
Table S5 GO enrichment function annotation of AgTPS genes in celery
Code	Class	GO_Name	GO_ID	GO_Level	P_value	EnrichmentScore	HitsGenesCountsInSelectedSet	HitsGenesCountsInBackground	AllGenesCountsInSelectedSet	AllGenesCountsInBackground	GenesOfSelectedSetInGOterm	corrected p-value(BH method)
1	Molecular function	(-)-endo-fenchol synthase activity	GO:0050437	6	0	463.167	6	6	24	11116	Ag7G00639.1,AgUnG01087.1,Ag7G00714.1,Ag7G00718.1,Ag2G02743.1,Ag10G00904.1,	0
2	Molecular function	magnesium ion binding	GO:0000287	6	0	45.3714	24	245	24	11116	Ag7G00639.1,Ag1G00277.1,Ag2G02893.1,Ag2G02391.1,Ag3G00885.1,AgUnG01087.1,Ag1G00256.1,Ag1G00362.1,Ag7G00714.1,Ag2G01390.1,Ag11G03222.1,Ag11G03223.1,Ag2G01494.1,Ag2G02697.1,Ag7G00718.1,Ag11G04986.1,Ag11G04984.1,Ag10G00733.1,Ag7G02405.1,Ag7G02406.1,Ag2G02743.1,Ag2G01387.1,Ag10G00393.1,Ag10G00904.1,	0
3	Molecular function	carbon-oxygen lyase activity	GO:0016835	4	0	59.1277	24	188	24	11116	Ag7G00639.1,Ag1G00277.1,Ag2G02893.1,Ag2G02391.1,Ag3G00885.1,AgUnG01087.1,Ag1G00256.1,Ag1G00362.1,Ag7G00714.1,Ag2G01390.1,Ag11G03222.1,Ag11G03223.1,Ag2G01494.1,Ag2G02697.1,Ag7G00718.1,Ag11G04986.1,Ag11G04984.1,Ag10G00733.1,Ag7G02405.1,Ag7G02406.1,Ag2G02743.1,Ag2G01387.1,Ag10G00393.1,Ag10G00904.1,	0
4	Molecular function	carbon-oxygen lyase activity, acting on phosphates	GO:0016838	5	0	264.667	24	42	24	11116	Ag7G00639.1,Ag1G00277.1,Ag2G02893.1,Ag2G02391.1,Ag3G00885.1,AgUnG01087.1,Ag1G00256.1,Ag1G00362.1,Ag7G00714.1,Ag2G01390.1,Ag11G03222.1,Ag11G03223.1,Ag2G01494.1,Ag2G02697.1,Ag7G00718.1,Ag11G04986.1,Ag11G04984.1,Ag10G00733.1,Ag7G02405.1,Ag7G02406.1,Ag2G02743.1,Ag2G01387.1,Ag10G00393.1,Ag10G00904.1,	0
5	Molecular function	(E)-beta-ocimene synthase activity	GO:0034768	6	0	463.167	6	6	24	11116	Ag7G00639.1,AgUnG01087.1,Ag7G00714.1,Ag7G00718.1,Ag2G02743.1,Ag10G00904.1,	0
6	Molecular function	R-linalool synthase activity	GO:0034008	6	0	463.167	7	7	24	11116	Ag7G00639.1,AgUnG01087.1,Ag7G00714.1,Ag2G01494.1,Ag7G00718.1,Ag2G02743.1,Ag10G00904.1,	0
7	Molecular function	alpha-copaene synthase activity	GO:0102877	6	0	463.167	6	6	24	11116	Ag1G00256.1,Ag1G00362.1,Ag2G02697.1,Ag11G04986.1,Ag7G02405.1,Ag7G02406.1,	0
8	Molecular function	terpene synthase activity	GO:0010333	6	0	347.375	24	32	24	11116	Ag7G00639.1,Ag1G00277.1,Ag2G02893.1,Ag2G02391.1,Ag3G00885.1,AgUnG01087.1,Ag1G00256.1,Ag1G00362.1,Ag7G00714.1,Ag2G01390.1,Ag11G03222.1,Ag11G03223.1,Ag2G01494.1,Ag2G02697.1,Ag7G00718.1,Ag11G04986.1,Ag11G04984.1,Ag10G00733.1,Ag7G02405.1,Ag7G02406.1,Ag2G02743.1,Ag2G01387.1,Ag10G00393.1,Ag10G00904.1,	0
9	Molecular function	gamma-terpinene synthase activity	GO:0102903	6	0	463.167	7	7	24	11116	AgUnG01087.1,Ag7G00714.1,Ag2G02697.1,Ag7G00718.1,Ag11G04986.1,Ag2G02743.1,Ag10G00904.1,	0
10	Molecular function	valencene synthase activity	GO:0102905	6	0	463.167	6	6	24	11116	Ag1G00256.1,Ag1G00362.1,Ag2G02697.1,Ag11G04986.1,Ag7G02405.1,Ag7G02406.1,	0
11	Molecular function	lyase activity	GO:0016829	3	1.11022e-16	23.1583	24	480	24	11116	Ag7G00639.1,Ag1G00277.1,Ag2G02893.1,Ag2G02391.1,Ag3G00885.1,AgUnG01087.1,Ag1G00256.1,Ag1G00362.1,Ag7G00714.1,Ag2G01390.1,Ag11G03222.1,Ag11G03223.1,Ag2G01494.1,Ag2G02697.1,Ag7G00718.1,Ag11G04986.1,Ag11G04984.1,Ag10G00733.1,Ag7G02405.1,Ag7G02406.1,Ag2G02743.1,Ag2G01387.1,Ag10G00393.1,Ag10G00904.1,	6.66134e-16
12	Molecular function	cyclase activity	GO:0009975	3	2.22045e-16	182.46	13	33	24	11116	Ag7G00639.1,Ag2G02893.1,AgUnG01087.1,Ag1G00256.1,Ag1G00362.1,Ag7G00714.1,Ag2G02697.1,Ag7G00718.1,Ag11G04986.1,Ag7G02405.1,Ag7G02406.1,Ag2G02743.1,Ag10G00904.1,	1.22125e-15
13	Molecular function	metal ion binding	GO:0046872	5	2.05391e-14	3.71152	24	2995	24	11116	Ag7G00639.1,Ag1G00277.1,Ag2G02893.1,Ag2G02391.1,Ag3G00885.1,AgUnG01087.1,Ag1G00256.1,Ag1G00362.1,Ag7G00714.1,Ag2G01390.1,Ag11G03222.1,Ag11G03223.1,Ag2G01494.1,Ag2G02697.1,Ag7G00718.1,Ag11G04986.1,Ag11G04984.1,Ag10G00733.1,Ag7G02405.1,Ag7G02406.1,Ag2G02743.1,Ag2G01387.1,Ag10G00393.1,Ag10G00904.1,	1.04276e-13
14	Molecular function	cation binding	GO:0043169	4	2.86438e-14	3.65658	24	3040	24	11116	Ag7G00639.1,Ag1G00277.1,Ag2G02893.1,Ag2G02391.1,Ag3G00885.1,AgUnG01087.1,Ag1G00256.1,Ag1G00362.1,Ag7G00714.1,Ag2G01390.1,Ag11G03222.1,Ag11G03223.1,Ag2G01494.1,Ag2G02697.1,Ag7G00718.1,Ag11G04986.1,Ag11G04984.1,Ag10G00733.1,Ag7G02405.1,Ag7G02406.1,Ag2G02743.1,Ag2G01387.1,Ag10G00393.1,Ag10G00904.1,	1.35035e-13
15	Molecular function	sabinene-hydrate synthase activity	GO:0050469	6	2.9643e-14	463.167	5	5	24	11116	AgUnG01087.1,Ag7G00714.1,Ag7G00718.1,Ag2G02743.1,Ag10G00904.1,	1.30429e-13
16	Molecular function	1,8-cineole synthase activity	GO:0102313	6	2.9643e-14	463.167	5	5	24	11116	Ag7G00639.1,AgUnG01087.1,Ag7G00714.1,Ag2G02743.1,Ag10G00904.1,	1.30429e-13
17	Molecular function	tricyclene synthase activity	GO:0102701	6	2.9643e-14	463.167	5	5	24	11116	Ag7G00639.1,AgUnG01087.1,Ag7G00714.1,Ag2G02743.1,Ag10G00904.1,	1.30429e-13
18	Molecular function	camphene synthase activity	GO:0102703	6	2.9643e-14	463.167	5	5	24	11116	AgUnG01087.1,Ag7G00714.1,Ag7G00718.1,Ag2G02743.1,Ag10G00904.1,	1.30429e-13
19	Molecular function	S-linalool synthase activity	GO:0034007	6	2.9643e-14	463.167	5	5	24	11116	AgUnG01087.1,Ag7G00714.1,Ag11G03222.1,Ag11G03223.1,Ag10G00904.1,	1.30429e-13
20	Molecular function	alpha-zingiberene synthase activity	GO:0102884	6	2.9643e-14	463.167	5	5	24	11116	AgUnG01087.1,Ag7G00714.1,Ag7G00718.1,Ag2G02743.1,Ag10G00904.1,	1.30429e-13
21	Molecular function	beta-elemene synthase activity	GO:0102889	6	2.9643e-14	463.167	5	5	24	11116	Ag2G02893.1,Ag1G00362.1,Ag2G02697.1,Ag11G04986.1,Ag7G02406.1,	1.30429e-13
22	Molecular function	intramolecular lyase activity	GO:0016872	4	4.06009e-13	173.688	6	16	24	11116	Ag2G02391.1,AgUnG01087.1,Ag7G00718.1,Ag10G00733.1,Ag2G02743.1,Ag10G00904.1,	1.21803e-12
23	Molecular function	manganese ion binding	GO:0030145	7	6.77495e-10	56.7143	6	49	24	11116	Ag7G00639.1,Ag7G00714.1,Ag7G00718.1,Ag7G02406.1,Ag2G02743.1,Ag10G00904.1,	1.86311e-09
24	Molecular function	ion binding	GO:0043167	3	8.29921e-10	2.38643	24	4658	24	11116	Ag7G00639.1,Ag1G00277.1,Ag2G02893.1,Ag2G02391.1,Ag3G00885.1,AgUnG01087.1,Ag1G00256.1,Ag1G00362.1,Ag7G00714.1,Ag2G01390.1,Ag11G03222.1,Ag11G03223.1,Ag2G01494.1,Ag2G02697.1,Ag7G00718.1,Ag11G04986.1,Ag11G04984.1,Ag10G00733.1,Ag7G02405.1,Ag7G02406.1,Ag2G02743.1,Ag2G01387.1,Ag10G00393.1,Ag10G00904.1,	2.19099e-09
25	Molecular function	protein homodimerization activity	GO:0042803	5	1.67736e-09	12.6895	10	365	24	11116	Ag7G00639.1,AgUnG01087.1,Ag1G00362.1,Ag7G00714.1,Ag2G02697.1,Ag7G00718.1,Ag7G02405.1,Ag7G02406.1,Ag2G02743.1,Ag10G00904.1,	4.25791e-09
26	Molecular function	protein dimerization activity	GO:0046983	4	9.16306e-07	6.52347	10	710	24	11116	Ag7G00639.1,AgUnG01087.1,Ag1G00362.1,Ag7G00714.1,Ag2G02697.1,Ag7G00718.1,Ag7G02405.1,Ag7G02406.1,Ag2G02743.1,Ag10G00904.1,	1.88988e-06
27	Molecular function	catalytic activity	GO:0003824	2	1.18797e-06	1.76416	24	6301	24	11116	Ag7G00639.1,Ag1G00277.1,Ag2G02893.1,Ag2G02391.1,Ag3G00885.1,AgUnG01087.1,Ag1G00256.1,Ag1G00362.1,Ag7G00714.1,Ag2G01390.1,Ag11G03222.1,Ag11G03223.1,Ag2G01494.1,Ag2G02697.1,Ag7G00718.1,Ag11G04986.1,Ag11G04984.1,Ag10G00733.1,Ag7G02405.1,Ag7G02406.1,Ag2G02743.1,Ag2G01387.1,Ag10G00393.1,Ag10G00904.1,	2.37595e-06
28	Molecular function	identical protein binding	GO:0042802	4	1.16381e-05	4.9273	10	940	24	11116	Ag7G00639.1,AgUnG01087.1,Ag1G00362.1,Ag7G00714.1,Ag2G02697.1,Ag7G00718.1,Ag7G02405.1,Ag7G02406.1,Ag2G02743.1,Ag10G00904.1,	1.92029e-05
29	Molecular function	isomerase activity	GO:0016853	3	2.22321e-05	9.925	6	280	24	11116	Ag2G02391.1,AgUnG01087.1,Ag7G00718.1,Ag10G00733.1,Ag2G02743.1,Ag10G00904.1,	3.57882e-05
30	Molecular function	binding	GO:0005488	2	0.00571498	1.23979	24	8966	24	11116	Ag7G00639.1,Ag1G00277.1,Ag2G02893.1,Ag2G02391.1,Ag3G00885.1,AgUnG01087.1,Ag1G00256.1,Ag1G00362.1,Ag7G00714.1,Ag2G01390.1,Ag11G03222.1,Ag11G03223.1,Ag2G01494.1,Ag2G02697.1,Ag7G00718.1,Ag11G04986.1,Ag11G04984.1,Ag10G00733.1,Ag7G02405.1,Ag7G02406.1,Ag2G02743.1,Ag2G01387.1,Ag10G00393.1,Ag10G00904.1,	0.00661735
31	Molecular function	transition metal ion binding	GO:0046914	6	0.0139919	2.90387	6	957	24	11116	Ag7G00639.1,Ag7G00714.1,Ag7G00718.1,Ag7G02406.1,Ag2G02743.1,Ag10G00904.1,	0.0159218
32	Cellular component	chloroplast	GO:0009507	7	1.25684e-05	3.46562	13	1871	23	11472	Ag7G00639.1,Ag2G02391.1,AgUnG01087.1,Ag7G00714.1,Ag2G01390.1,Ag2G01494.1,Ag7G00718.1,Ag10G00733.1,Ag7G02405.1,Ag7G02406.1,Ag2G02743.1,Ag2G01387.1,Ag10G00904.1,	0.000263935
33	Cellular component	plastid	GO:0009536	6	7.46561e-05	2.72985	14	2558	23	11472	Ag7G00639.1,Ag2G02391.1,AgUnG01087.1,Ag7G00714.1,Ag2G01390.1,Ag11G03223.1,Ag2G01494.1,Ag7G00718.1,Ag10G00733.1,Ag7G02405.1,Ag7G02406.1,Ag2G02743.1,Ag2G01387.1,Ag10G00904.1,	0.000783889
34	Cellular component	plastid membrane	GO:0042170	5	0.000970929	4.95479	6	604	23	11472	AgUnG01087.1,Ag2G01390.1,Ag2G01494.1,Ag7G00718.1,Ag2G01387.1,Ag10G00904.1,	0.0067965
35	Cellular component	cytoplasm	GO:0005737	3	0.00134953	1.3324	23	8610	23	11472	Ag7G00639.1,Ag1G00277.1,Ag2G02893.1,Ag2G02391.1,Ag3G00885.1,AgUnG01087.1,Ag1G00256.1,Ag1G00362.1,Ag7G00714.1,Ag2G01390.1,Ag11G03223.1,Ag2G01494.1,Ag2G02697.1,Ag7G00718.1,Ag11G04986.1,Ag11G04984.1,Ag10G00733.1,Ag7G02405.1,Ag7G02406.1,Ag2G02743.1,Ag2G01387.1,Ag10G00393.1,Ag10G00904.1,	0.00708505
36	Cellular component	plastid envelope	GO:0009526	5	0.00592034	3.46778	6	863	23	11472	AgUnG01087.1,Ag2G01390.1,Ag2G01494.1,Ag7G00718.1,Ag2G01387.1,Ag10G00904.1,	0.0248654
37	Cellular component	plastid stroma	GO:0009532	3	0.00724205	3.95859	5	630	23	11472	Ag7G00639.1,AgUnG01087.1,Ag2G02743.1,Ag2G01387.1,Ag10G00904.1,	0.0253472
38	Biological process	sesquiterpene metabolic process	GO:0051761	8	0	192.5	14	36	23	11385	Ag7G00639.1,Ag2G02893.1,Ag3G00885.1,AgUnG01087.1,Ag1G00256.1,Ag1G00362.1,Ag7G00714.1,Ag2G02697.1,Ag7G00718.1,Ag11G04986.1,Ag7G02405.1,Ag7G02406.1,Ag2G02743.1,Ag10G00904.1,	0
39	Biological process	sesquiterpene biosynthetic process	GO:0051762	9	0	175.645	11	31	23	11385	Ag2G02893.1,Ag3G00885.1,AgUnG01087.1,Ag1G00362.1,Ag7G00714.1,Ag7G00718.1,Ag11G04986.1,Ag7G02405.1,Ag7G02406.1,Ag2G02743.1,Ag10G00904.1,	0
40	Biological process	geranyl diphosphate metabolic process	GO:0033383	8	0	291.176	10	17	23	11385	Ag7G00639.1,AgUnG01087.1,Ag1G00362.1,Ag7G00714.1,Ag7G00718.1,Ag11G04986.1,Ag7G02405.1,Ag7G02406.1,Ag2G02743.1,Ag10G00904.1,	0
41	Biological process	isoprenoid catabolic process	GO:0008300	7	0	86.087	16	92	23	11385	Ag7G00639.1,Ag2G02391.1,Ag3G00885.1,AgUnG01087.1,Ag1G00256.1,Ag1G00362.1,Ag7G00714.1,Ag2G01494.1,Ag2G02697.1,Ag7G00718.1,Ag11G04986.1,Ag10G00733.1,Ag7G02405.1,Ag7G02406.1,Ag2G02743.1,Ag10G00904.1,	0
42	Biological process	terpene biosynthetic process	GO:0046246	8	0	119.051	19	79	23	11385	Ag7G00639.1,Ag2G02893.1,Ag2G02391.1,Ag3G00885.1,AgUnG01087.1,Ag1G00256.1,Ag1G00362.1,Ag7G00714.1,Ag2G01390.1,Ag2G01494.1,Ag2G02697.1,Ag7G00718.1,Ag11G04986.1,Ag10G00733.1,Ag7G02405.1,Ag7G02406.1,Ag2G02743.1,Ag2G01387.1,Ag10G00904.1,	0
43	Biological process	phospholipid catabolic process	GO:0009395	7	0	232.941	16	34	23	11385	Ag7G00639.1,Ag2G02391.1,Ag3G00885.1,AgUnG01087.1,Ag1G00256.1,Ag1G00362.1,Ag7G00714.1,Ag2G01494.1,Ag2G02697.1,Ag7G00718.1,Ag11G04986.1,Ag10G00733.1,Ag7G02405.1,Ag7G02406.1,Ag2G02743.1,Ag10G00904.1,	0
44	Biological process	cellular lipid catabolic process	GO:0044242	6	0	37.8947	16	209	23	11385	Ag7G00639.1,Ag2G02391.1,Ag3G00885.1,AgUnG01087.1,Ag1G00256.1,Ag1G00362.1,Ag7G00714.1,Ag2G01494.1,Ag2G02697.1,Ag7G00718.1,Ag11G04986.1,Ag10G00733.1,Ag7G02405.1,Ag7G02406.1,Ag2G02743.1,Ag10G00904.1,	0
45	Biological process	diterpenoid metabolic process	GO:0016101	8	0	72.057	23	158	23	11385	Ag7G00639.1,Ag1G00277.1,Ag2G02893.1,Ag2G02391.1,Ag3G00885.1,AgUnG01087.1,Ag1G00256.1,Ag1G00362.1,Ag7G00714.1,Ag2G01390.1,Ag11G03223.1,Ag2G01494.1,Ag2G02697.1,Ag7G00718.1,Ag11G04986.1,Ag11G04984.1,Ag10G00733.1,Ag7G02405.1,Ag7G02406.1,Ag2G02743.1,Ag2G01387.1,Ag10G00393.1,Ag10G00904.1,	0
46	Biological process	terpene metabolic process	GO:0042214	7	0	92.2059	19	102	23	11385	Ag7G00639.1,Ag2G02893.1,Ag2G02391.1,Ag3G00885.1,AgUnG01087.1,Ag1G00256.1,Ag1G00362.1,Ag7G00714.1,Ag2G01390.1,Ag2G01494.1,Ag2G02697.1,Ag7G00718.1,Ag11G04986.1,Ag10G00733.1,Ag7G02405.1,Ag7G02406.1,Ag2G02743.1,Ag2G01387.1,Ag10G00904.1,	0
47	Biological process	terpenoid biosynthetic process	GO:0016114	8	0	35.6897	23	319	23	11385	Ag7G00639.1,Ag1G00277.1,Ag2G02893.1,Ag2G02391.1,Ag3G00885.1,AgUnG01087.1,Ag1G00256.1,Ag1G00362.1,Ag7G00714.1,Ag2G01390.1,Ag11G03223.1,Ag2G01494.1,Ag2G02697.1,Ag7G00718.1,Ag11G04986.1,Ag11G04984.1,Ag10G00733.1,Ag7G02405.1,Ag7G02406.1,Ag2G02743.1,Ag2G01387.1,Ag10G00393.1,Ag10G00904.1,	0
48	Biological process	terpenoid catabolic process	GO:0016115	8	0	94.2857	16	84	23	11385	Ag7G00639.1,Ag2G02391.1,Ag3G00885.1,AgUnG01087.1,Ag1G00256.1,Ag1G00362.1,Ag7G00714.1,Ag2G01494.1,Ag2G02697.1,Ag7G00718.1,Ag11G04986.1,Ag10G00733.1,Ag7G02405.1,Ag7G02406.1,Ag2G02743.1,Ag10G00904.1,	0
49	Biological process	farnesyl diphosphate metabolic process	GO:0045338	8	0	247.5	13	26	23	11385	Ag7G00639.1,Ag3G00885.1,AgUnG01087.1,Ag1G00256.1,Ag1G00362.1,Ag7G00714.1,Ag2G02697.1,Ag7G00718.1,Ag11G04986.1,Ag7G02405.1,Ag7G02406.1,Ag2G02743.1,Ag10G00904.1,	0
50	Biological process	farnesyl diphosphate catabolic process	GO:0045339	9	0	495	7	7	23	11385	Ag7G00639.1,Ag3G00885.1,AgUnG01087.1,Ag7G00714.1,Ag7G00718.1,Ag2G02743.1,Ag10G00904.1,	0
51	Biological process	organophosphate catabolic process	GO:0046434	6	0	78.4158	16	101	23	11385	Ag7G00639.1,Ag2G02391.1,Ag3G00885.1,AgUnG01087.1,Ag1G00256.1,Ag1G00362.1,Ag7G00714.1,Ag2G01494.1,Ag2G02697.1,Ag7G00718.1,Ag11G04986.1,Ag10G00733.1,Ag7G02405.1,Ag7G02406.1,Ag2G02743.1,Ag10G00904.1,	0
52	Biological process	green leaf volatile biosynthetic process	GO:0010597	10	0	63.7129	13	101	23	11385	Ag2G02893.1,AgUnG01087.1,Ag1G00256.1,Ag1G00362.1,Ag7G00714.1,Ag2G02697.1,Ag7G00718.1,Ag11G04986.1,Ag10G00733.1,Ag7G02405.1,Ag7G02406.1,Ag2G02743.1,Ag10G00904.1,	0
53	Biological process	lipid biosynthetic process	GO:0008610	5	0	11.3623	23	1002	23	11385	Ag7G00639.1,Ag1G00277.1,Ag2G02893.1,Ag2G02391.1,Ag3G00885.1,AgUnG01087.1,Ag1G00256.1,Ag1G00362.1,Ag7G00714.1,Ag2G01390.1,Ag11G03223.1,Ag2G01494.1,Ag2G02697.1,Ag7G00718.1,Ag11G04986.1,Ag11G04984.1,Ag10G00733.1,Ag7G02405.1,Ag7G02406.1,Ag2G02743.1,Ag2G01387.1,Ag10G00393.1,Ag10G00904.1,	0
54	Biological process	lipoxygenase pathway	GO:0019372	9	0	60.7075	13	106	23	11385	Ag2G02893.1,AgUnG01087.1,Ag1G00256.1,Ag1G00362.1,Ag7G00714.1,Ag2G02697.1,Ag7G00718.1,Ag11G04986.1,Ag10G00733.1,Ag7G02405.1,Ag7G02406.1,Ag2G02743.1,Ag10G00904.1,	0
55	Biological process	hydrocarbon biosynthetic process	GO:0120251	5	0	60.6774	19	155	23	11385	Ag7G00639.1,Ag2G02893.1,Ag2G02391.1,Ag3G00885.1,AgUnG01087.1,Ag1G00256.1,Ag1G00362.1,Ag7G00714.1,Ag2G01390.1,Ag2G01494.1,Ag2G02697.1,Ag7G00718.1,Ag11G04986.1,Ag10G00733.1,Ag7G02405.1,Ag7G02406.1,Ag2G02743.1,Ag2G01387.1,Ag10G00904.1,	0
56	Biological process	hydrocarbon metabolic process	GO:0120252	4	0	51.6758	19	182	23	11385	Ag7G00639.1,Ag2G02893.1,Ag2G02391.1,Ag3G00885.1,AgUnG01087.1,Ag1G00256.1,Ag1G00362.1,Ag7G00714.1,Ag2G01390.1,Ag2G01494.1,Ag2G02697.1,Ag7G00718.1,Ag11G04986.1,Ag10G00733.1,Ag7G02405.1,Ag7G02406.1,Ag2G02743.1,Ag2G01387.1,Ag10G00904.1,	0
57	Biological process	lipid metabolic process	GO:0006629	4	0	6.99754	23	1627	23	11385	Ag7G00639.1,Ag1G00277.1,Ag2G02893.1,Ag2G02391.1,Ag3G00885.1,AgUnG01087.1,Ag1G00256.1,Ag1G00362.1,Ag7G00714.1,Ag2G01390.1,Ag11G03223.1,Ag2G01494.1,Ag2G02697.1,Ag7G00718.1,Ag11G04986.1,Ag11G04984.1,Ag10G00733.1,Ag7G02405.1,Ag7G02406.1,Ag2G02743.1,Ag2G01387.1,Ag10G00393.1,Ag10G00904.1,	0
58	Biological process	sesquiterpenoid metabolic process	GO:0006714	8	1.11022e-16	60	12	99	23	11385	Ag7G00639.1,Ag2G02893.1,AgUnG01087.1,Ag7G00714.1,Ag2G01494.1,Ag2G02697.1,Ag7G00718.1,Ag11G04986.1,Ag7G02405.1,Ag7G02406.1,Ag2G02743.1,Ag10G00904.1,	1.14194e-15
59	Biological process	lipid catabolic process	GO:0016042	5	1.11022e-16	21.7582	16	364	23	11385	Ag7G00639.1,Ag2G02391.1,Ag3G00885.1,AgUnG01087.1,Ag1G00256.1,Ag1G00362.1,Ag7G00714.1,Ag2G01494.1,Ag2G02697.1,Ag7G00718.1,Ag11G04986.1,Ag10G00733.1,Ag7G02405.1,Ag7G02406.1,Ag2G02743.1,Ag10G00904.1,	1.14194e-15
60	Biological process	sesquiterpenoid biosynthetic process	GO:0016106	9	1.11022e-16	78.1579	12	76	23	11385	Ag7G00639.1,Ag2G02893.1,AgUnG01087.1,Ag7G00714.1,Ag2G01494.1,Ag2G02697.1,Ag7G00718.1,Ag11G04986.1,Ag7G02405.1,Ag7G02406.1,Ag2G02743.1,Ag10G00904.1,	1.14194e-15
61	Biological process	icosanoid metabolic process	GO:0006690	7	2.22045e-16	45	13	143	23	11385	Ag2G02893.1,AgUnG01087.1,Ag1G00256.1,Ag1G00362.1,Ag7G00714.1,Ag2G02697.1,Ag7G00718.1,Ag11G04986.1,Ag10G00733.1,Ag7G02405.1,Ag7G02406.1,Ag2G02743.1,Ag10G00904.1,	1.9984e-15
62	Biological process	isoprenoid metabolic process	GO:0006720	6	2.22045e-16	24.6429	23	462	23	11385	Ag7G00639.1,Ag1G00277.1,Ag2G02893.1,Ag2G02391.1,Ag3G00885.1,AgUnG01087.1,Ag1G00256.1,Ag1G00362.1,Ag7G00714.1,Ag2G01390.1,Ag11G03223.1,Ag2G01494.1,Ag2G02697.1,Ag7G00718.1,Ag11G04986.1,Ag11G04984.1,Ag10G00733.1,Ag7G02405.1,Ag7G02406.1,Ag2G02743.1,Ag2G01387.1,Ag10G00393.1,Ag10G00904.1,	1.9984e-15
63	Biological process	isoprenoid biosynthetic process	GO:0008299	7	2.22045e-16	29.6484	23	384	23	11385	Ag7G00639.1,Ag1G00277.1,Ag2G02893.1,Ag2G02391.1,Ag3G00885.1,AgUnG01087.1,Ag1G00256.1,Ag1G00362.1,Ag7G00714.1,Ag2G01390.1,Ag11G03223.1,Ag2G01494.1,Ag2G02697.1,Ag7G00718.1,Ag11G04986.1,Ag11G04984.1,Ag10G00733.1,Ag7G02405.1,Ag7G02406.1,Ag2G02743.1,Ag2G01387.1,Ag10G00393.1,Ag10G00904.1,	1.9984e-15
64	Biological process	cellular lipid metabolic process	GO:0044255	5	2.22045e-16	8.81192	23	1292	23	11385	Ag7G00639.1,Ag1G00277.1,Ag2G02893.1,Ag2G02391.1,Ag3G00885.1,AgUnG01087.1,Ag1G00256.1,Ag1G00362.1,Ag7G00714.1,Ag2G01390.1,Ag11G03223.1,Ag2G01494.1,Ag2G02697.1,Ag7G00718.1,Ag11G04986.1,Ag11G04984.1,Ag10G00733.1,Ag7G02405.1,Ag7G02406.1,Ag2G02743.1,Ag2G01387.1,Ag10G00393.1,Ag10G00904.1,	1.9984e-15
65	Biological process	diterpenoid biosynthetic process	GO:0016102	9	2.22045e-16	102.062	20	97	23	11385	Ag7G00639.1,Ag1G00277.1,Ag2G02893.1,Ag2G02391.1,Ag3G00885.1,AgUnG01087.1,Ag1G00256.1,Ag1G00362.1,Ag7G00714.1,Ag2G01390.1,Ag11G03223.1,Ag2G01494.1,Ag2G02697.1,Ag7G00718.1,Ag11G04986.1,Ag7G02405.1,Ag7G02406.1,Ag2G02743.1,Ag2G01387.1,Ag10G00904.1,	1.9984e-15
66	Biological process	terpenoid metabolic process	GO:0006721	7	3.33067e-16	27.5	23	414	23	11385	Ag7G00639.1,Ag1G00277.1,Ag2G02893.1,Ag2G02391.1,Ag3G00885.1,AgUnG01087.1,Ag1G00256.1,Ag1G00362.1,Ag7G00714.1,Ag2G01390.1,Ag11G03223.1,Ag2G01494.1,Ag2G02697.1,Ag7G00718.1,Ag11G04986.1,Ag11G04984.1,Ag10G00733.1,Ag7G02405.1,Ag7G02406.1,Ag2G02743.1,Ag2G01387.1,Ag10G00393.1,Ag10G00904.1,	2.48077e-15
67	Biological process	isoprene metabolic process	GO:0043611	8	3.33067e-16	495	6	6	23	11385	Ag7G00639.1,AgUnG01087.1,Ag7G00714.1,Ag7G00718.1,Ag2G02743.1,Ag10G00904.1,	2.48077e-15
68	Biological process	phospholipid metabolic process	GO:0006644	6	3.33067e-16	29.4424	16	269	23	11385	Ag7G00639.1,Ag2G02391.1,Ag3G00885.1,AgUnG01087.1,Ag1G00256.1,Ag1G00362.1,Ag7G00714.1,Ag2G01494.1,Ag2G02697.1,Ag7G00718.1,Ag11G04986.1,Ag10G00733.1,Ag7G02405.1,Ag7G02406.1,Ag2G02743.1,Ag10G00904.1,	2.48077e-15
69	Biological process	dimethylallyl diphosphate metabolic process	GO:0050993	7	2.88658e-15	330	6	9	23	11385	Ag7G00639.1,AgUnG01087.1,Ag7G00714.1,Ag7G00718.1,Ag2G02743.1,Ag10G00904.1,	1.94844e-14
70	Biological process	monoterpenoid biosynthetic process	GO:0016099	9	6.55032e-15	96.5854	8	41	23	11385	Ag7G00639.1,AgUnG01087.1,Ag7G00714.1,Ag2G01494.1,Ag7G00718.1,Ag11G04986.1,Ag2G02743.1,Ag10G00904.1,	4.28748e-14
71	Biological process	pinene metabolic process	GO:0033073	9	2.09832e-14	495	5	5	23	11385	AgUnG01087.1,Ag7G00714.1,Ag7G00718.1,Ag2G02743.1,Ag10G00904.1,	1.33305e-13
72	Biological process	(+)-epi-alpha-bisabolol metabolic process	GO:1901941	9	2.09832e-14	495	5	5	23	11385	AgUnG01087.1,Ag7G00714.1,Ag7G00718.1,Ag2G02743.1,Ag10G00904.1,	1.33305e-13
73	Biological process	limonene metabolic process	GO:0018923	9	2.09832e-14	495	5	5	23	11385	AgUnG01087.1,Ag7G00714.1,Ag7G00718.1,Ag2G02743.1,Ag10G00904.1,	1.33305e-13
74	Biological process	organophosphate metabolic process	GO:0019637	5	2.18714e-14	10.3937	16	762	23	11385	Ag7G00639.1,Ag2G02391.1,Ag3G00885.1,AgUnG01087.1,Ag1G00256.1,Ag1G00362.1,Ag7G00714.1,Ag2G01494.1,Ag2G02697.1,Ag7G00718.1,Ag11G04986.1,Ag10G00733.1,Ag7G02405.1,Ag7G02406.1,Ag2G02743.1,Ag10G00904.1,	1.27682e-13
75	Biological process	monoterpenoid metabolic process	GO:0016098	8	9.41469e-14	70.7143	8	56	23	11385	Ag7G00639.1,AgUnG01087.1,Ag7G00714.1,Ag2G01494.1,Ag7G00718.1,Ag11G04986.1,Ag2G02743.1,Ag10G00904.1,	5.35151e-13
76	Biological process	monoterpene metabolic process	GO:0043692	8	9.91429e-14	212.143	6	14	23	11385	Ag7G00639.1,AgUnG01087.1,Ag7G00714.1,Ag7G00718.1,Ag2G02743.1,Ag10G00904.1,	5.49099e-13
77	Biological process	response to herbivore	GO:0080027	6	7.37965e-13	88.8462	7	39	23	11385	Ag7G00639.1,Ag2G02893.1,AgUnG01087.1,Ag11G03223.1,Ag7G02405.1,Ag2G02743.1,Ag10G00904.1,	3.98501e-12
78	Biological process	sepal development	GO:0048442	6	2.64833e-12	275	5	9	23	11385	Ag1G00256.1,Ag1G00362.1,Ag2G02697.1,Ag7G02405.1,Ag7G02406.1,	1.39522e-11
79	Biological process	fatty acid metabolic process	GO:0006631	8	8.55105e-12	11.2108	13	574	23	11385	Ag2G02893.1,AgUnG01087.1,Ag1G00256.1,Ag1G00362.1,Ag7G00714.1,Ag2G02697.1,Ag7G00718.1,Ag11G04986.1,Ag10G00733.1,Ag7G02405.1,Ag7G02406.1,Ag2G02743.1,Ag10G00904.1,	4.39768e-11
80	Biological process	flower calyx development	GO:0048464	5	9.68448e-12	225	5	11	23	11385	Ag1G00256.1,Ag1G00362.1,Ag2G02697.1,Ag7G02405.1,Ag7G02406.1,	4.86476e-11
81	Biological process	monoterpene biosynthetic process	GO:0043693	9	2.69073e-11	190.385	5	13	23	11385	AgUnG01087.1,Ag7G00714.1,Ag7G00718.1,Ag2G02743.1,Ag10G00904.1,	1.21083e-10
82	Biological process	stigma development	GO:0048480	4	4.17999e-11	176.786	5	14	23	11385	Ag1G00256.1,Ag1G00362.1,Ag2G02697.1,Ag7G02405.1,Ag7G02406.1,	1.84261e-10
83	Biological process	organic acid metabolic process	GO:0006082	4	5.87072e-10	4.79214	17	1756	23	11385	Ag2G02893.1,Ag2G02391.1,AgUnG01087.1,Ag1G00256.1,Ag1G00362.1,Ag7G00714.1,Ag2G01390.1,Ag2G01494.1,Ag2G02697.1,Ag7G00718.1,Ag11G04986.1,Ag10G00733.1,Ag7G02405.1,Ag7G02406.1,Ag2G02743.1,Ag2G01387.1,Ag10G00904.1,	2.53615e-09
84	Biological process	olefin metabolic process	GO:1900673	5	6.41384e-10	57.1154	6	52	23	11385	Ag7G00639.1,AgUnG01087.1,Ag7G00714.1,Ag7G00718.1,Ag2G02743.1,Ag10G00904.1,	2.71645e-09
85	Biological process	olefin biosynthetic process	GO:1900674	6	6.41384e-10	57.1154	6	52	23	11385	Ag7G00639.1,AgUnG01087.1,Ag7G00714.1,Ag7G00718.1,Ag2G02743.1,Ag10G00904.1,	2.71645e-09
86	Biological process	cellular process involved in reproduction in multicellular organism	GO:0022412	3	4.10586e-09	77.3437	5	32	23	11385	Ag1G00256.1,Ag1G00362.1,Ag2G02697.1,Ag7G02405.1,Ag7G02406.1,	1.67333e-08
87	Biological process	cellular biosynthetic process	GO:0044249	4	4.29779e-09	2.30793	23	4933	23	11385	Ag7G00639.1,Ag1G00277.1,Ag2G02893.1,Ag2G02391.1,Ag3G00885.1,AgUnG01087.1,Ag1G00256.1,Ag1G00362.1,Ag7G00714.1,Ag2G01390.1,Ag11G03223.1,Ag2G01494.1,Ag2G02697.1,Ag7G00718.1,Ag11G04986.1,Ag11G04984.1,Ag10G00733.1,Ag7G02405.1,Ag7G02406.1,Ag2G02743.1,Ag2G01387.1,Ag10G00393.1,Ag10G00904.1,	1.71912e-08
88	Biological process	cellular catabolic process	GO:0044248	4	7.80226e-09	4.51797	16	1753	23	11385	Ag7G00639.1,Ag2G02391.1,Ag3G00885.1,AgUnG01087.1,Ag1G00256.1,Ag1G00362.1,Ag7G00714.1,Ag2G01494.1,Ag2G02697.1,Ag7G00718.1,Ag11G04986.1,Ag10G00733.1,Ag7G02405.1,Ag7G02406.1,Ag2G02743.1,Ag10G00904.1,	2.85642e-08
89	Biological process	organic substance biosynthetic process	GO:1901576	4	8.3803e-09	2.24202	23	5078	23	11385	Ag7G00639.1,Ag1G00277.1,Ag2G02893.1,Ag2G02391.1,Ag3G00885.1,AgUnG01087.1,Ag1G00256.1,Ag1G00362.1,Ag7G00714.1,Ag2G01390.1,Ag11G03223.1,Ag2G01494.1,Ag2G02697.1,Ag7G00718.1,Ag11G04986.1,Ag11G04984.1,Ag10G00733.1,Ag7G02405.1,Ag7G02406.1,Ag2G02743.1,Ag2G01387.1,Ag10G00393.1,Ag10G00904.1,	3.01691e-08
90	Biological process	monocarboxylic acid metabolic process	GO:0032787	7	1.03471e-08	6.33366	13	1016	23	11385	Ag2G02893.1,AgUnG01087.1,Ag1G00256.1,Ag1G00362.1,Ag7G00714.1,Ag2G02697.1,Ag7G00718.1,Ag11G04986.1,Ag10G00733.1,Ag7G02405.1,Ag7G02406.1,Ag2G02743.1,Ag10G00904.1,	3.6639e-08
91	Biological process	biosynthetic process	GO:0009058	3	1.39179e-08	2.19322	23	5191	23	11385	Ag7G00639.1,Ag1G00277.1,Ag2G02893.1,Ag2G02391.1,Ag3G00885.1,AgUnG01087.1,Ag1G00256.1,Ag1G00362.1,Ag7G00714.1,Ag2G01390.1,Ag11G03223.1,Ag2G01494.1,Ag2G02697.1,Ag7G00718.1,Ag11G04986.1,Ag11G04984.1,Ag10G00733.1,Ag7G02405.1,Ag7G02406.1,Ag2G02743.1,Ag2G01387.1,Ag10G00393.1,Ag10G00904.1,	4.84882e-08
92	Biological process	phosphate-containing compound metabolic process	GO:0006796	5	1.98742e-08	4.2421	16	1867	23	11385	Ag7G00639.1,Ag2G02391.1,Ag3G00885.1,AgUnG01087.1,Ag1G00256.1,Ag1G00362.1,Ag7G00714.1,Ag2G01494.1,Ag2G02697.1,Ag7G00718.1,Ag11G04986.1,Ag10G00733.1,Ag7G02405.1,Ag7G02406.1,Ag2G02743.1,Ag10G00904.1,	6.81402e-08
93	Biological process	organic substance catabolic process	GO:1901575	4	2.57481e-08	4.16842	16	1900	23	11385	Ag7G00639.1,Ag2G02391.1,Ag3G00885.1,AgUnG01087.1,Ag1G00256.1,Ag1G00362.1,Ag7G00714.1,Ag2G01494.1,Ag2G02697.1,Ag7G00718.1,Ag11G04986.1,Ag10G00733.1,Ag7G02405.1,Ag7G02406.1,Ag2G02743.1,Ag10G00904.1,	8.68999e-08
94	Biological process	olefinic compound biosynthetic process	GO:0120255	5	2.59205e-08	20.7485	7	167	23	11385	Ag7G00639.1,AgUnG01087.1,Ag7G00714.1,Ag2G01494.1,Ag7G00718.1,Ag2G02743.1,Ag10G00904.1,	8.61359e-08
95	Biological process	phosphorus metabolic process	GO:0006793	4	2.76083e-08	4.14877	16	1909	23	11385	Ag7G00639.1,Ag2G02391.1,Ag3G00885.1,AgUnG01087.1,Ag1G00256.1,Ag1G00362.1,Ag7G00714.1,Ag2G01494.1,Ag2G02697.1,Ag7G00718.1,Ag11G04986.1,Ag10G00733.1,Ag7G02405.1,Ag7G02406.1,Ag2G02743.1,Ag10G00904.1,	9.03546e-08
96	Biological process	response to jasmonic acid	GO:0009753	7	7.63919e-08	10.3125	9	432	23	11385	Ag7G00639.1,AgUnG01087.1,Ag1G00362.1,Ag11G03223.1,Ag2G01494.1,Ag11G04986.1,Ag7G02405.1,Ag2G02743.1,Ag10G00904.1,	2.46278e-07
97	Biological process	small molecule metabolic process	GO:0044281	3	9.15629e-08	3.48303	17	2416	23	11385	Ag2G02893.1,Ag2G02391.1,AgUnG01087.1,Ag1G00256.1,Ag1G00362.1,Ag7G00714.1,Ag2G01390.1,Ag2G01494.1,Ag2G02697.1,Ag7G00718.1,Ag11G04986.1,Ag10G00733.1,Ag7G02405.1,Ag7G02406.1,Ag2G02743.1,Ag2G01387.1,Ag10G00904.1,	2.90847e-07
98	Biological process	carpel development	GO:0048440	6	1.74211e-07	37.5	5	66	23	11385	Ag1G00256.1,Ag1G00362.1,Ag2G02697.1,Ag7G02405.1,Ag7G02406.1,	5.45358e-07
99	Biological process	catabolic process	GO:0009056	3	2.02078e-07	3.6214	16	2187	23	11385	Ag7G00639.1,Ag2G02391.1,Ag3G00885.1,AgUnG01087.1,Ag1G00256.1,Ag1G00362.1,Ag7G00714.1,Ag2G01494.1,Ag2G02697.1,Ag7G00718.1,Ag11G04986.1,Ag10G00733.1,Ag7G02405.1,Ag7G02406.1,Ag2G02743.1,Ag10G00904.1,	6.23555e-07
100	Biological process	response to fatty acid	GO:0070542	6	2.36352e-07	9.03651	9	493	23	11385	Ag7G00639.1,AgUnG01087.1,Ag1G00362.1,Ag11G03223.1,Ag2G01494.1,Ag11G04986.1,Ag7G02405.1,Ag2G02743.1,Ag10G00904.1,	7.19042e-07
101	Biological process	olefinic compound metabolic process	GO:0120254	4	4.4557e-07	13.6957	7	253	23	11385	Ag7G00639.1,AgUnG01087.1,Ag7G00714.1,Ag2G01494.1,Ag7G00718.1,Ag2G02743.1,Ag10G00904.1,	1.3184e-06
102	Biological process	response to insect	GO:0009625	6	5.87646e-07	29.4643	5	84	23	11385	Ag7G00639.1,AgUnG01087.1,Ag7G00714.1,Ag2G02743.1,Ag10G00904.1,	1.71529e-06
103	Biological process	gynoecium development	GO:0048467	5	7.00552e-07	28.4483	5	87	23	11385	Ag1G00256.1,Ag1G00362.1,Ag2G02697.1,Ag7G02405.1,Ag7G02406.1,	2.01759e-06
104	Biological process	anther development	GO:0048653	4	1.2058e-06	25.5155	5	97	23	11385	Ag1G00256.1,Ag1G00362.1,Ag2G02697.1,Ag7G02405.1,Ag7G02406.1,	3.38252e-06
105	Biological process	carboxylic acid metabolic process	GO:0019752	6	1.22733e-06	4.24472	13	1516	23	11385	Ag2G02893.1,AgUnG01087.1,Ag1G00256.1,Ag1G00362.1,Ag7G00714.1,Ag2G02697.1,Ag7G00718.1,Ag11G04986.1,Ag10G00733.1,Ag7G02405.1,Ag7G02406.1,Ag2G02743.1,Ag10G00904.1,	3.39875e-06
106	Biological process	trichome differentiation	GO:0010026	5	1.40307e-06	24.75	5	100	23	11385	Ag1G00256.1,Ag1G00362.1,Ag2G02697.1,Ag7G02405.1,Ag7G02406.1,	3.83624e-06
107	Biological process	cell fate commitment	GO:0045165	4	2.25091e-06	22.5	5	110	23	11385	Ag1G00256.1,Ag1G00362.1,Ag2G02697.1,Ag7G02405.1,Ag7G02406.1,	6.07746e-06
108	Biological process	oxoacid metabolic process	GO:0043436	5	4.02547e-06	3.83036	13	1680	23	11385	Ag2G02893.1,AgUnG01087.1,Ag1G00256.1,Ag1G00362.1,Ag7G00714.1,Ag2G02697.1,Ag7G00718.1,Ag11G04986.1,Ag10G00733.1,Ag7G02405.1,Ag7G02406.1,Ag2G02743.1,Ag10G00904.1,	1.03512e-05
109	Biological process	stamen development	GO:0048443	6	6.16849e-06	18.3333	5	135	23	11385	Ag1G00256.1,Ag1G00362.1,Ag2G02697.1,Ag7G02405.1,Ag7G02406.1,	1.5493e-05
110	Biological process	response to lipid	GO:0033993	5	1.28892e-05	3.45782	13	1861	23	11385	Ag7G00639.1,Ag2G02391.1,AgUnG01087.1,Ag1G00256.1,Ag1G00362.1,Ag7G00714.1,Ag11G03223.1,Ag2G01494.1,Ag11G04986.1,Ag7G02405.1,Ag2G02743.1,Ag2G01387.1,Ag10G00904.1,	3.20008e-05
111	Biological process	androecium development	GO:0048466	5	1.32842e-05	15.6646	5	158	23	11385	Ag1G00256.1,Ag1G00362.1,Ag2G02697.1,Ag7G02405.1,Ag7G02406.1,	3.22402e-05
112	Biological process	response to wounding	GO:0009611	4	3.71432e-05	5.75581	8	688	23	11385	Ag7G00639.1,AgUnG01087.1,Ag7G00714.1,Ag11G03223.1,Ag7G00718.1,Ag10G00733.1,Ag2G02743.1,Ag10G00904.1,	8.8164e-05
113	Biological process	response to hormone	GO:0009725	5	5.01253e-05	2.82396	14	2454	23	11385	Ag7G00639.1,Ag2G02391.1,AgUnG01087.1,Ag1G00256.1,Ag1G00362.1,Ag7G00714.1,Ag11G03223.1,Ag2G01494.1,Ag11G04986.1,Ag7G02405.1,Ag7G02406.1,Ag2G02743.1,Ag2G01387.1,Ag10G00904.1,	0.000117685
114	Biological process	defense response	GO:0006952	4	9.58393e-05	2.88436	13	2231	23	11385	Ag2G02391.1,AgUnG01087.1,Ag1G00256.1,Ag1G00362.1,Ag7G00714.1,Ag2G01390.1,Ag2G01494.1,Ag11G04986.1,Ag10G00733.1,Ag7G02405.1,Ag2G02743.1,Ag2G01387.1,Ag10G00904.1,	0.000222594
115	Biological process	organic cyclic compound biosynthetic process	GO:1901362	5	0.000124419	2.43842	15	3045	23	11385	Ag7G00639.1,Ag2G02391.1,AgUnG01087.1,Ag1G00256.1,Ag1G00362.1,Ag7G00714.1,Ag2G02697.1,Ag7G00718.1,Ag11G04986.1,Ag10G00733.1,Ag7G02405.1,Ag7G02406.1,Ag2G02743.1,Ag2G01387.1,Ag10G00904.1,	0.000285899
116	Biological process	response to endogenous stimulus	GO:0009719	3	0.000146271	2.57621	14	2690	23	11385	Ag7G00639.1,Ag2G02391.1,AgUnG01087.1,Ag1G00256.1,Ag1G00362.1,Ag7G00714.1,Ag11G03223.1,Ag2G01494.1,Ag11G04986.1,Ag7G02405.1,Ag7G02406.1,Ag2G02743.1,Ag2G01387.1,Ag10G00904.1,	0.000332573
117	Biological process	floral whorl development	GO:0048438	4	0.000174307	9.13284	5	271	23	11385	Ag1G00256.1,Ag1G00362.1,Ag2G02697.1,Ag7G02405.1,Ag7G02406.1,	0.000392191
118	Biological process	biological process involved in interspecies interaction between organisms	GO:0044419	2	0.000185275	2.7129	13	2372	23	11385	Ag7G00639.1,Ag2G02893.1,Ag3G00885.1,AgUnG01087.1,Ag1G00256.1,Ag1G00362.1,Ag7G00714.1,Ag11G03223.1,Ag2G01494.1,Ag2G02697.1,Ag7G02405.1,Ag2G02743.1,Ag10G00904.1,	0.000412571
119	Biological process	primary metabolic process	GO:0044238	3	0.000197695	1.44829	23	7861	23	11385	Ag7G00639.1,Ag1G00277.1,Ag2G02893.1,Ag2G02391.1,Ag3G00885.1,AgUnG01087.1,Ag1G00256.1,Ag1G00362.1,Ag7G00714.1,Ag2G01390.1,Ag11G03223.1,Ag2G01494.1,Ag2G02697.1,Ag7G00718.1,Ag11G04986.1,Ag11G04984.1,Ag10G00733.1,Ag7G02405.1,Ag7G02406.1,Ag2G02743.1,Ag2G01387.1,Ag10G00393.1,Ag10G00904.1,	0.000435736
120	Biological process	small molecule biosynthetic process	GO:0044283	4	0.000297103	3.75316	9	1187	23	11385	Ag2G02391.1,AgUnG01087.1,Ag2G01390.1,Ag2G01494.1,Ag7G00718.1,Ag10G00733.1,Ag2G02743.1,Ag2G01387.1,Ag10G00904.1,	0.000641742
121	Biological process	response to other organism	GO:0051707	5	0.000484199	2.66248	12	2231	23	11385	Ag7G00639.1,Ag2G02893.1,Ag3G00885.1,AgUnG01087.1,Ag1G00256.1,Ag1G00362.1,Ag7G00714.1,Ag11G03223.1,Ag2G01494.1,Ag7G02405.1,Ag2G02743.1,Ag10G00904.1,	0.00103551
122	Biological process	response to external biotic stimulus	GO:0043207	4	0.000501194	2.65297	12	2239	23	11385	Ag7G00639.1,Ag2G02893.1,Ag3G00885.1,AgUnG01087.1,Ag1G00256.1,Ag1G00362.1,Ag7G00714.1,Ag11G03223.1,Ag2G01494.1,Ag7G02405.1,Ag2G02743.1,Ag10G00904.1,	0.00106135
123	Biological process	floral organ development	GO:0048437	5	0.000598713	6.99153	5	354	23	11385	Ag1G00256.1,Ag1G00362.1,Ag2G02697.1,Ag7G02405.1,Ag7G02406.1,	0.00125555
124	Biological process	cellular response to environmental stimulus	GO:0104004	4	0.000610946	5.40984	6	549	23	11385	Ag7G00639.1,AgUnG01087.1,Ag7G00714.1,Ag7G00718.1,Ag2G02743.1,Ag10G00904.1,	0.00126889
125	Biological process	cellular metabolic process	GO:0044237	3	0.000659229	1.3745	23	8283	23	11385	Ag7G00639.1,Ag1G00277.1,Ag2G02893.1,Ag2G02391.1,Ag3G00885.1,AgUnG01087.1,Ag1G00256.1,Ag1G00362.1,Ag7G00714.1,Ag2G01390.1,Ag11G03223.1,Ag2G01494.1,Ag2G02697.1,Ag7G00718.1,Ag11G04986.1,Ag11G04984.1,Ag10G00733.1,Ag7G02405.1,Ag7G02406.1,Ag2G02743.1,Ag2G01387.1,Ag10G00393.1,Ag10G00904.1,	0.00135613
126	Biological process	response to biotic stimulus	GO:0009607	3	0.000919199	2.48952	12	2386	23	11385	Ag7G00639.1,Ag2G02893.1,Ag3G00885.1,AgUnG01087.1,Ag1G00256.1,Ag1G00362.1,Ag7G00714.1,Ag11G03223.1,Ag2G01494.1,Ag7G02405.1,Ag2G02743.1,Ag10G00904.1,	0.00185558
127	Biological process	plant epidermis development	GO:0090558	5	0.00100588	6.23426	5	397	23	11385	Ag1G00256.1,Ag1G00362.1,Ag2G02697.1,Ag7G02405.1,Ag7G02406.1,	0.00201176
128	Biological process	organic substance metabolic process	GO:0071704	3	0.00113892	1.34225	23	8482	23	11385	Ag7G00639.1,Ag1G00277.1,Ag2G02893.1,Ag2G02391.1,Ag3G00885.1,AgUnG01087.1,Ag1G00256.1,Ag1G00362.1,Ag7G00714.1,Ag2G01390.1,Ag11G03223.1,Ag2G01494.1,Ag2G02697.1,Ag7G00718.1,Ag11G04986.1,Ag11G04984.1,Ag10G00733.1,Ag7G02405.1,Ag7G02406.1,Ag2G02743.1,Ag2G01387.1,Ag10G00393.1,Ag10G00904.1,	0.00225694
129	Biological process	multicellular organism reproduction	GO:0032504	3	0.00117503	6.0219	5	411	23	11385	Ag1G00256.1,Ag1G00362.1,Ag2G02697.1,Ag7G02405.1,Ag7G02406.1,	0.00230732
130	Biological process	response to organic substance	GO:0010033	4	0.00130149	2.11862	14	3271	23	11385	Ag7G00639.1,Ag2G02391.1,AgUnG01087.1,Ag1G00256.1,Ag1G00362.1,Ag7G00714.1,Ag11G03223.1,Ag2G01494.1,Ag11G04986.1,Ag7G02405.1,Ag7G02406.1,Ag2G02743.1,Ag2G01387.1,Ag10G00904.1,	0.00253264
131	Biological process	response to oxygen-containing compound	GO:1901700	4	0.0014174	2.22896	13	2887	23	11385	Ag7G00639.1,Ag2G02391.1,AgUnG01087.1,Ag1G00256.1,Ag1G00362.1,Ag7G00714.1,Ag11G03223.1,Ag2G01494.1,Ag11G04986.1,Ag7G02405.1,Ag2G02743.1,Ag2G01387.1,Ag10G00904.1,	0.00273356
132	Biological process	response to stimulus	GO:0050896	2	0.00174231	1.54808	20	6395	23	11385	Ag7G00639.1,Ag2G02893.1,Ag2G02391.1,Ag3G00885.1,AgUnG01087.1,Ag1G00256.1,Ag1G00362.1,Ag7G00714.1,Ag2G01390.1,Ag11G03223.1,Ag2G01494.1,Ag2G02697.1,Ag7G00718.1,Ag11G04986.1,Ag10G00733.1,Ag7G02405.1,Ag7G02406.1,Ag2G02743.1,Ag2G01387.1,Ag10G00904.1,	0.00333043
133	Biological process	anatomical structure maturation	GO:0071695	4	0.0035922	4.66981	5	530	23	11385	Ag1G00256.1,Ag1G00362.1,Ag2G02697.1,Ag7G02405.1,Ag7G02406.1,	0.00646597
134	Biological process	leaf development	GO:0048366	6	0.00377051	4.61754	5	536	23	11385	Ag1G00256.1,Ag1G00362.1,Ag2G02697.1,Ag7G02405.1,Ag7G02406.1,	0.00673083
135	Biological process	metabolic process	GO:0008152	2	0.00378429	1.27406	23	8936	23	11385	Ag7G00639.1,Ag1G00277.1,Ag2G02893.1,Ag2G02391.1,Ag3G00885.1,AgUnG01087.1,Ag1G00256.1,Ag1G00362.1,Ag7G00714.1,Ag2G01390.1,Ag11G03223.1,Ag2G01494.1,Ag2G02697.1,Ag7G00718.1,Ag11G04986.1,Ag11G04984.1,Ag10G00733.1,Ag7G02405.1,Ag7G02406.1,Ag2G02743.1,Ag2G01387.1,Ag10G00393.1,Ag10G00904.1,	0.00670005
136	Biological process	response to stress	GO:0006950	3	0.00417283	1.73077	16	4576	23	11385	Ag7G00639.1,Ag2G02391.1,AgUnG01087.1,Ag1G00256.1,Ag1G00362.1,Ag7G00714.1,Ag2G01390.1,Ag11G03223.1,Ag2G01494.1,Ag7G00718.1,Ag11G04986.1,Ag10G00733.1,Ag7G02405.1,Ag2G02743.1,Ag2G01387.1,Ag10G00904.1,	0.0073279
137	Biological process	response to external stimulus	GO:0009605	3	0.00675672	1.99731	12	2974	23	11385	Ag7G00639.1,Ag2G02893.1,Ag3G00885.1,AgUnG01087.1,Ag1G00256.1,Ag1G00362.1,Ag7G00714.1,Ag11G03223.1,Ag2G01494.1,Ag7G02405.1,Ag2G02743.1,Ag10G00904.1,	0.0114918
138	Biological process	developmental maturation	GO:0021700	3	0.00742584	3.93482	5	629	23	11385	Ag1G00256.1,Ag1G00362.1,Ag2G02697.1,Ag7G02405.1,Ag7G02406.1,	0.0123383
139	Biological process	organic cyclic compound metabolic process	GO:1901360	4	0.00952005	1.67645	15	4429	23	11385	Ag7G00639.1,Ag2G02391.1,AgUnG01087.1,Ag1G00256.1,Ag1G00362.1,Ag7G00714.1,Ag2G02697.1,Ag7G00718.1,Ag11G04986.1,Ag10G00733.1,Ag7G02405.1,Ag7G02406.1,Ag2G02743.1,Ag2G01387.1,Ag10G00904.1,	0.0155783
140	Biological process	aging	GO:0007568	3	0.010881	3.58696	5	690	23	11385	Ag1G00256.1,Ag1G00362.1,Ag2G02697.1,Ag7G02405.1,Ag7G02406.1,	0.0175396
141	Biological process	flower development	GO:0009908	7	0.011946	3.50567	5	706	23	11385	Ag1G00256.1,Ag1G00362.1,Ag2G02697.1,Ag7G02405.1,Ag7G02406.1,	0.0191137
142	Biological process	reproductive shoot system development	GO:0090567	6	0.0122232	3.48592	5	710	23	11385	Ag1G00256.1,Ag1G00362.1,Ag2G02697.1,Ag7G02405.1,Ag7G02406.1,	0.0192716
143	Biological process	embryo development	GO:0009790	5	0.013676	3.39041	5	730	23	11385	Ag1G00256.1,Ag1G00362.1,Ag2G02697.1,Ag7G02405.1,Ag7G02406.1,	0.0214059
144	Biological process	phyllome development	GO:0048827	5	0.0185528	3.14086	5	788	23	11385	Ag1G00256.1,Ag1G00362.1,Ag2G02697.1,Ag7G02405.1,Ag7G02406.1,	0.0288302
145	Biological process	response to chemical	GO:0042221	3	0.0187107	1.62867	14	4255	23	11385	Ag7G00639.1,Ag2G02391.1,AgUnG01087.1,Ag1G00256.1,Ag1G00362.1,Ag7G00714.1,Ag11G03223.1,Ag2G01494.1,Ag11G04986.1,Ag7G02405.1,Ag7G02406.1,Ag2G02743.1,Ag2G01387.1,Ag10G00904.1,	0.028868
146	Biological process	organic acid biosynthetic process	GO:0016053	5	0.0286168	2.80931	5	881	23	11385	Ag2G02391.1,Ag2G01390.1,Ag2G01494.1,Ag10G00733.1,Ag2G01387.1,	0.0426292
147	Biological process	response to acid chemical	GO:0001101	4	0.0362685	2.63859	5	938	23	11385	AgUnG01087.1,Ag1G00362.1,Ag7G00714.1,Ag2G02743.1,Ag10G00904.1,	0.0532924
